# Supplementary material for: A strategically designed small molecule attacks alpha-ketoglutarate dehydrogenase in tumor cells through a redox process
Source: PubMed Central journal article supplement (PMC4108059; doi:10.1186/2049-3002-2-4), 2014-03-10

# Chemical Effects on Amplex Red Reaction

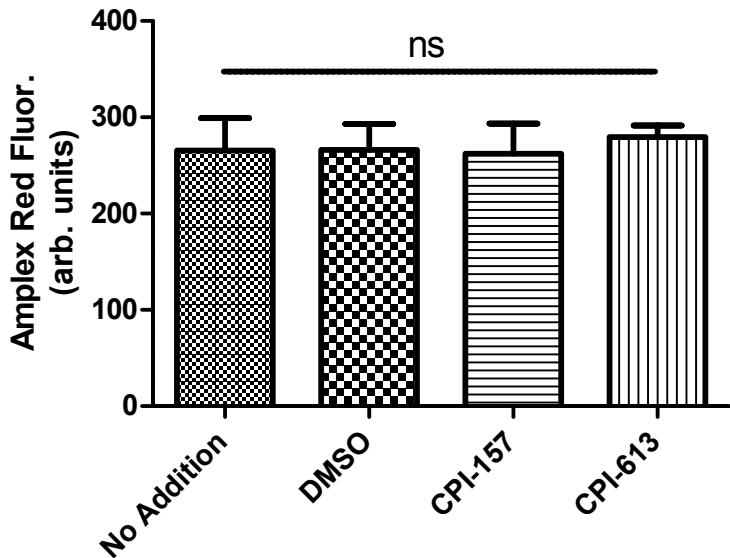

Supplement: 2049-3002-2-4-S3.pdf [file 2049-3002-2-4-S3.pdf]
